# Supplementary material
Source: PubMed Central journal article supplement (PMC6744361)
Supplement: NIHMS1031229-supplement-Supp_info.pdf [file NIHMS1031229-supplement-Supp_info.pdf]

## SUPPORTING MATERIAL

FIGURE S1 BRCA1

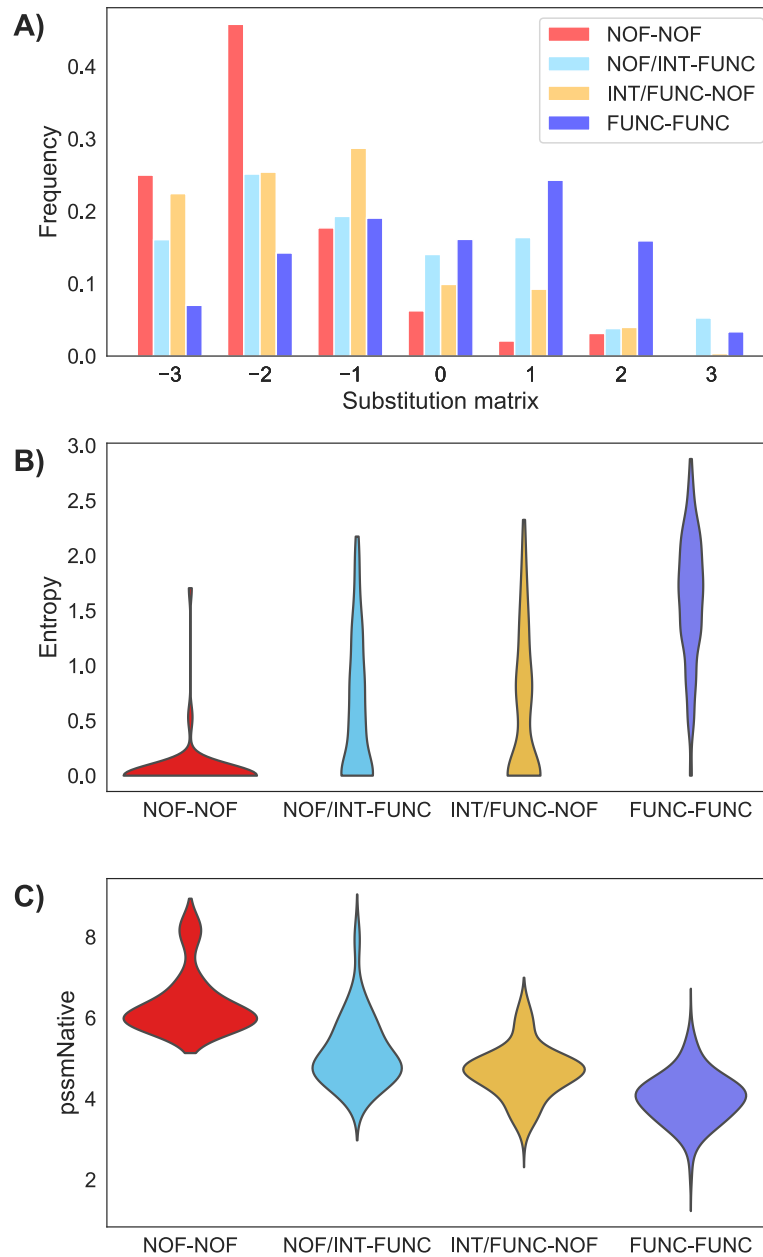

**Figure S1. Feature distributions for the outlier populations in Figure 3.** The three figures represent value distributions for (A) the substitution matrix (Blosum62) elements, (B) Shannon's entropy, and (C) pssm<sub>Nat</sub>. In each figure, we display four variant populations from the following regions in Figure 3: FUNC-FUNC (dark blue), NOF-NOF (red), the outliers from the quadrants NOF-FUNC plus INT-FUNC (light blue), and the outliers from the quadrants INT-NOF plus FUNC-NOF (orange). Each region is identified by the functional class of its variants in the HDR and SGE assays; this

functional class is the same for either assay: 'functional' (FUNC), 'intermediate' (INT), and 'non-functional' (NOF).

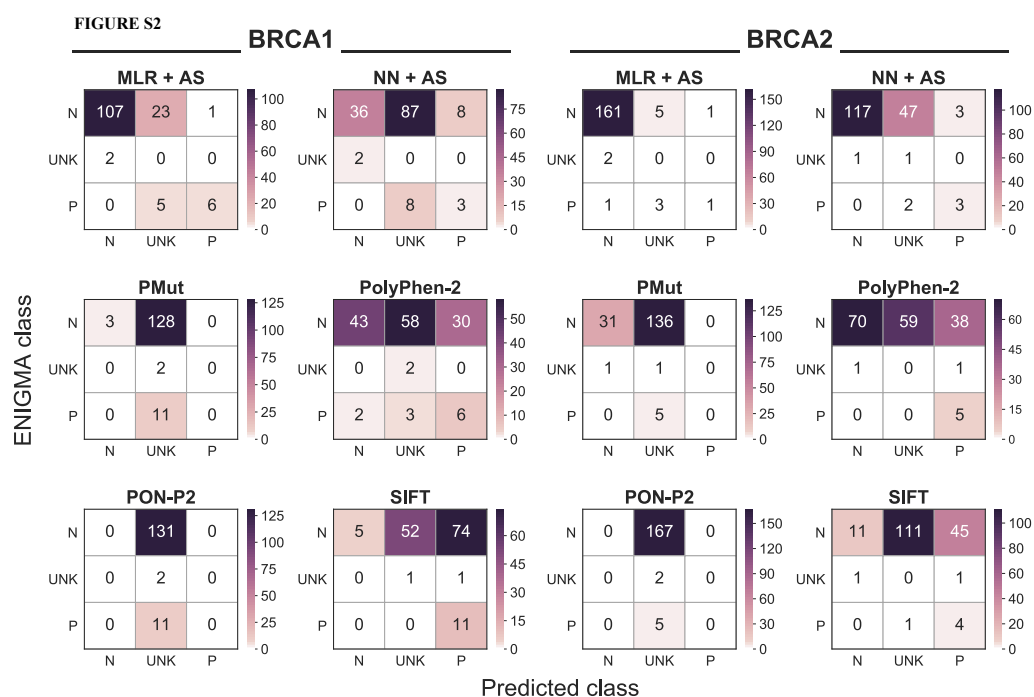

**Figure S2. Heatmap of the predictor performances on the CAGI datasets.** Each heatmap represents the confusion matrix of a predictor. We provide six heatmaps per protein, two for our predictors (MLR+AS and NN+AS) and four for the general predictors (PolyPhen-2, PON-P2, PMut, and SIFT). In all the plots, the vertical and horizontal axis respectively correspond to the observed (provided by CAGI organizers) and predicted classes, in the 3-class, reduced version of the IARC 5-tier classification. Diagonal and off-diagonal elements correspond to successful and failed predictions, respectively.

NOTE: given the range differences in the predictions, each plot has its color scale.

**Table S1. The CAGI predictions.** In the separate excel file Table\_S1.xlsx, we provide the four list of predictions we submitted to the CAGI experiment. In every list we give, for each of the BRCA1 and BRCA2 variants, the following information: DNA description of the variant; gene name; protein description of the variant; predicted IARC 5-tier class; p; sd; and current IARC 5-tier class according to the ENIGMA consortium.
